# Supplementary material
Source: MDPI journal article supplement (https://www.mdpi.com/2304-6740/6/1/35)

# checkCIF/PLATON report

You have not supplied any structure factors. As a result the full set of tests cannot be run.

THIS REPORT IS FOR GUIDANCE ONLY. IF USED AS PART OF A REVIEW PROCEDURE FOR PUBLICATION, IT SHOULD NOT REPLACE THE EXPERTISE OF AN EXPERIENCED CRYSTALLOGRAPHIC REFEREE.

No syntax errors found.      CIF dictionary      Interpreting this report

## Datablock: FM108B

---

|                 |                    |                                     |
|-----------------|--------------------|-------------------------------------|
| Bond precision: | C-C = 0.0068 A     | Wavelength=0.71073                  |
| Cell:           | a=8.2231(11)       | b=12.833(2)      c=17.175(2)        |
|                 | alpha=80.864(7)    | beta=77.901(7)      gamma=88.862(8) |
| Temperature:    | 273 K              |                                     |
|                 | Calculated         | Reported                            |
| Volume          | 1749.5(4)          | 1749.5(4)                           |
| Space group     | P -1               | P -1                                |
| Hall group      | -P 1               | -P 1                                |
| Moiety formula  | C64 H70 Dy2 O22 S2 | C32 H35 Dy O11 S                    |
| Sum formula     | C64 H70 Dy2 O22 S2 | C32 H35 Dy O11 S                    |
| Mr              | 1580.32            | 790.16                              |
| Dx,g cm-3       | 1.500              | 1.500                               |
| Z               | 1                  | 2                                   |
| Mu (mm-1)       | 2.250              | 2.250                               |
| F000            | 794.0              | 794.0                               |
| F000'           | 794.24             |                                     |
| h,k,lmax        | 10,16,21           | 10,16,21                            |
| Nref            | 7156               | 7081                                |
| Tmin,Tmax       | 0.763,0.835        |                                     |
| Tmin'           | 0.746              |                                     |

Correction method= Not given

Data completeness= 0.990      Theta(max)= 26.371

R(reflections)= 0.0354( 5879)      wR2(reflections)= 0.0816( 7081)

S = 1.048      Npar= 419

---

The following ALERTS were generated. Each ALERT has the format  
**test-name\_ALERT\_alert-type\_alert-level.**  
Click on the hyperlinks for more details of the test.

---

## 🟡 Alert level B

|                   |      |                                           |           |
|-------------------|------|-------------------------------------------|-----------|
| PLAT241_ALERT_2_B | High | 'MainMol' Ueq as Compared to Neighbors of | C31 Check |
| PLAT241_ALERT_2_B | High | 'MainMol' Ueq as Compared to Neighbors of | C32 Check |

## 🟢 Alert level C

|                   |                                                  |      |        |
|-------------------|--------------------------------------------------|------|--------|
| PLAT094_ALERT_2_C | Ratio of Maximum / Minimum Residual Density .... | 2.33 | Report |
| PLAT220_ALERT_2_C | Non-Solvent Resd 1 C Ueq(max)/Ueq(min) Range     | 4.9  | Ratio  |
| PLAT222_ALERT_3_C | Non-Solv. Resd 1 H Uiso(max)/Uiso(min) Range     | 5.4  | Ratio  |
| PLAT234_ALERT_4_C | Large Hirshfeld Difference S1A --C32             | 0.16 | Ang.   |
| PLAT234_ALERT_4_C | Large Hirshfeld Difference S1B --C31             | 0.19 | Ang.   |
| PLAT241_ALERT_2_C | High 'MainMol' Ueq as Compared to Neighbors of   | C8   | Check  |
| PLAT242_ALERT_2_C | Low 'MainMol' Ueq as Compared to Neighbors of    | C6   | Check  |
| PLAT601_ALERT_2_C | Structure Contains Solvent Accessible VOIDS of . | 77   | Ang**3 |

## 🟠 Alert level G

|                   |                                                  |        |        |
|-------------------|--------------------------------------------------|--------|--------|
| PLAT007_ALERT_5_G | Number of Unrefined Donor-H Atoms .....          | 2      | Report |
| PLAT012_ALERT_1_G | No _shelx_res_checksum Found in CIF .....        | Please | Check  |
| PLAT042_ALERT_1_G | Calc. and Reported MoietyFormula Strings Differ  | Please | Check  |
| PLAT045_ALERT_1_G | Calculated and Reported Z Differ by a Factor ... | 0.50   | Check  |
| PLAT199_ALERT_1_G | Reported _cell_measurement_temperature ..... (K) | 273    | Check  |
| PLAT200_ALERT_1_G | Reported _diffrn_ambient_temperature ..... (K)   | 273    | Check  |
| PLAT232_ALERT_2_G | Hirshfeld Test Diff (M-X) Dyl --O5 .             | 5.4    | s.u.   |
| PLAT232_ALERT_2_G | Hirshfeld Test Diff (M-X) Dyl --O8_a .           | 5.6    | s.u.   |
| PLAT300_ALERT_4_G | Atom Site Occupancy of S1A Constrained at        | 0.8    | Check  |
| PLAT300_ALERT_4_G | Atom Site Occupancy of S1B Constrained at        | 0.2    | Check  |
| PLAT300_ALERT_4_G | Atom Site Occupancy of H31A Constrained at       | 0.8    | Check  |
| PLAT300_ALERT_4_G | Atom Site Occupancy of H31B Constrained at       | 0.8    | Check  |
| PLAT300_ALERT_4_G | Atom Site Occupancy of H31C Constrained at       | 0.8    | Check  |
| PLAT300_ALERT_4_G | Atom Site Occupancy of H32A Constrained at       | 0.8    | Check  |
| PLAT300_ALERT_4_G | Atom Site Occupancy of H32B Constrained at       | 0.8    | Check  |
| PLAT300_ALERT_4_G | Atom Site Occupancy of H32C Constrained at       | 0.8    | Check  |
| PLAT300_ALERT_4_G | Atom Site Occupancy of H31D Constrained at       | 0.2    | Check  |
| PLAT300_ALERT_4_G | Atom Site Occupancy of H31E Constrained at       | 0.2    | Check  |
| PLAT300_ALERT_4_G | Atom Site Occupancy of H31F Constrained at       | 0.2    | Check  |
| PLAT300_ALERT_4_G | Atom Site Occupancy of H32D Constrained at       | 0.2    | Check  |
| PLAT300_ALERT_4_G | Atom Site Occupancy of H32E Constrained at       | 0.2    | Check  |
| PLAT300_ALERT_4_G | Atom Site Occupancy of H32F Constrained at       | 0.2    | Check  |
| PLAT301_ALERT_3_G | Main Residue Disorder .....(Resd 1 )             | 2%     | Note   |
| PLAT933_ALERT_2_G | Number of OMIT Records in Embedded .res File ... | 19     | Note   |

0 **ALERT level A** = Most likely a serious problem - resolve or explain  
2 **ALERT level B** = A potentially serious problem, consider carefully  
8 **ALERT level C** = Check. Ensure it is not caused by an omission or oversight  
24 **ALERT level G** = General information/check it is not something unexpected

5 ALERT type 1 CIF construction/syntax error, inconsistent or missing data  
10 ALERT type 2 Indicator that the structure model may be wrong or deficient  
2 ALERT type 3 Indicator that the structure quality may be low  
16 ALERT type 4 Improvement, methodology, query or suggestion  
1 ALERT type 5 Informative message, check

It is advisable to attempt to resolve as many as possible of the alerts in all categories. Often the minor alerts point to easily fixed oversights, errors and omissions in your CIF or refinement strategy, so attention to these fine details can be worthwhile. In order to resolve some of the more serious problems it may be necessary to carry out additional measurements or structure refinements. However, the purpose of your study may justify the reported deviations and the more serious of these should normally be commented upon in the discussion or experimental section of a paper or in the "special\_details" fields of the CIF. checkCIF was carefully designed to identify outliers and unusual parameters, but every test has its limitations and alerts that are not important in a particular case may appear. Conversely, the absence of alerts does not guarantee there are no aspects of the results needing attention. It is up to the individual to critically assess their own results and, if necessary, seek expert advice.

### **Publication of your CIF in IUCr journals**

A basic structural check has been run on your CIF. These basic checks will be run on all CIFs submitted for publication in IUCr journals (*Acta Crystallographica*, *Journal of Applied Crystallography*, *Journal of Synchrotron Radiation*); however, if you intend to submit to *Acta Crystallographica Section C* or *E* or *IUCrData*, you should make sure that full publication checks are run on the final version of your CIF prior to submission.

### **Publication of your CIF in other journals**

Please refer to the *Notes for Authors* of the relevant journal for any special instructions relating to CIF submission.

---

**PLATON version of 30/01/2018; check.def file version of 30/01/2018**

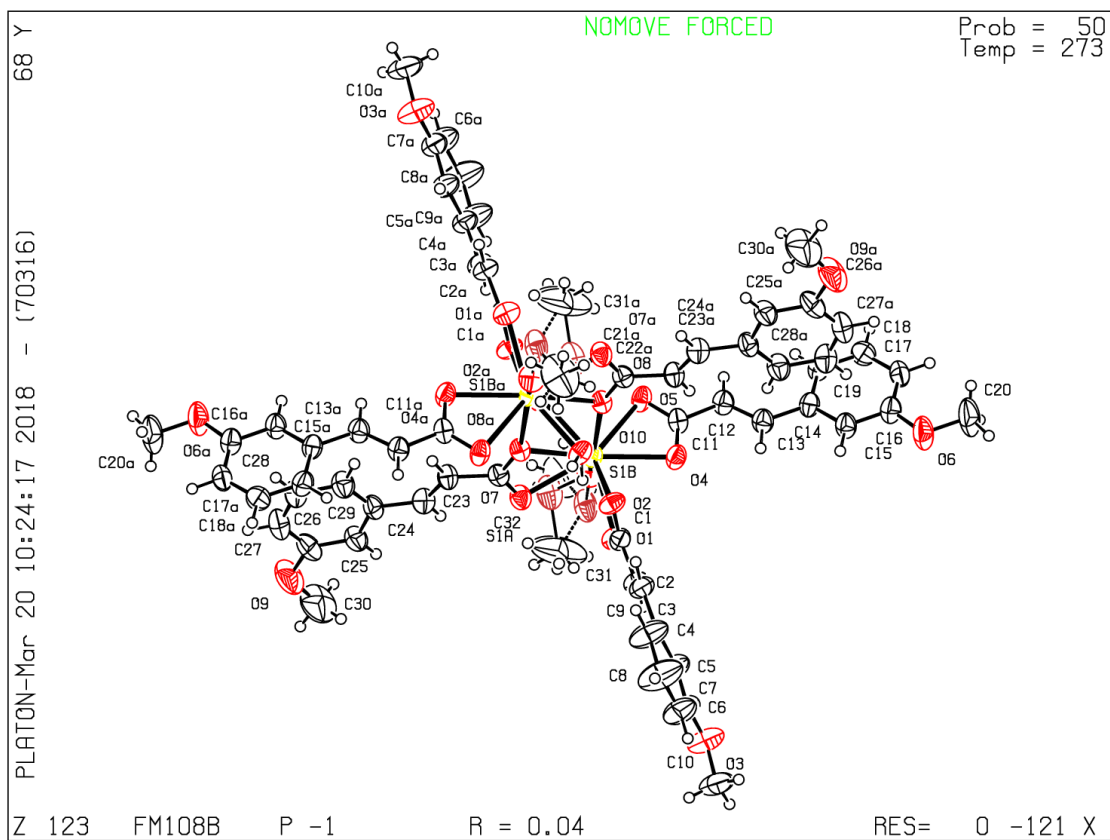

Supplement: s1 [file s1]
