# Supplementary material
Source: MDPI journal article supplement (https://www.mdpi.com/2304-6740/6/1/35)
Supplement: s1 [file s1]

# Supplementary Materials: Field-Induced Slow Relaxation in a Dinuclear Dysprosium(III) Complex Based on 3-Methoxycinnamic Acid

Ouafa Khalfaoui, Adel Beghidja, Jérôme Long, Chahrazed Beghidja, Yannick Guari and Joulia Larionova

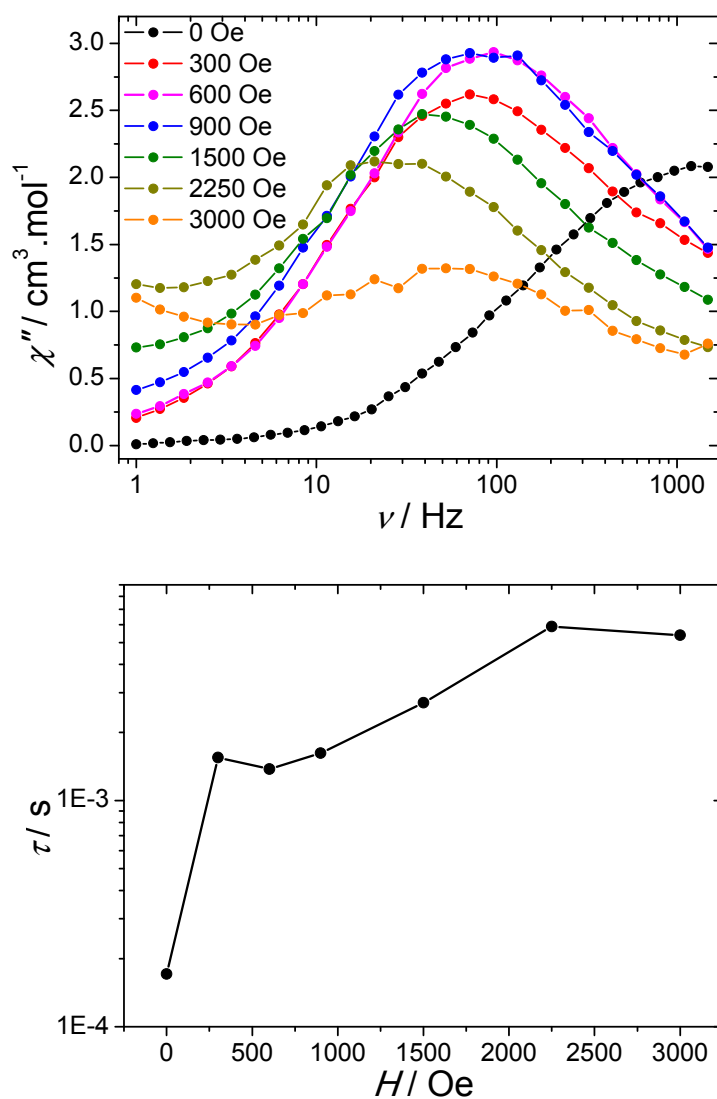

**Figure S1.** Top: Field dependence of the out-of-phase susceptibility,  $\chi''$ , at 1.8 K for **1**. Bottom: Field dependence of the relaxation time. The red solid line represents the fit using equation (1).

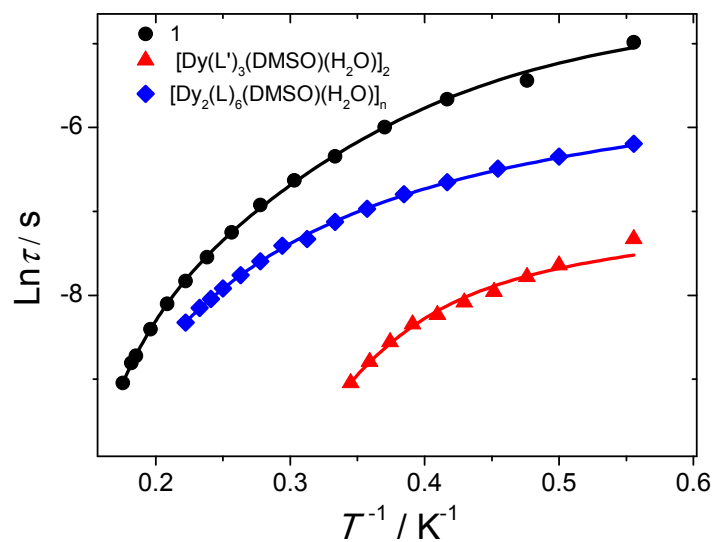

**Figure S2.** Temperature dependence of the relaxation time for the three different dysprosium compounds. The solid line represent the fit.

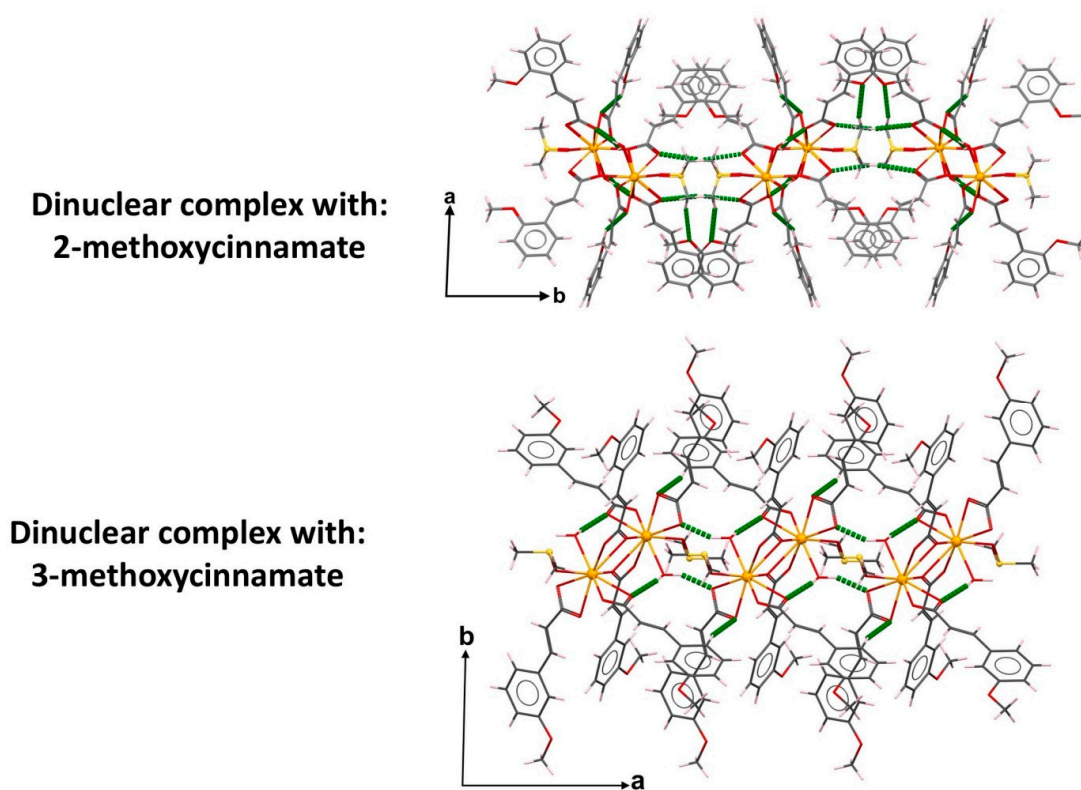

**Figure S3.** Differences in the packing arrangement between the dinuclear complexes.

**Table S1.** Crystal data, data collection and refinement details for 1.

|                                                                                    |                                                     |
|------------------------------------------------------------------------------------|-----------------------------------------------------|
| Formula                                                                            | C <sub>32</sub> H <sub>35</sub> DyO <sub>11</sub> S |
| Mass Mw (g/mol)                                                                    | 790.16                                              |
| Crystal system                                                                     | Triclinic                                           |
| Space group                                                                        | P-1                                                 |
| Temperature (K)                                                                    | 293(2)                                              |
| a (Å)                                                                              | 8.2231(11)                                          |
| b (Å)                                                                              | 12.833(2)                                           |
| c (Å)                                                                              | 17.175(2)                                           |
| α(°)                                                                               | 80.864(7)                                           |
| γ(°)                                                                               | 77.901(7)                                           |
| β(°)                                                                               | 88.862(8)                                           |
| V(Å <sup>3</sup> )                                                                 | 1749.5(4)                                           |
| Z                                                                                  | 2                                                   |
| qcalc. (g.cm <sup>-3</sup> )                                                       | 1.5                                                 |
| μ (mm <sup>-1</sup> )                                                              | 2.25                                                |
| R <sub>i</sub> [I > 2σ(I)]                                                         | 0.0354                                              |
| wR <sub>2</sub> [I > 2σ(I)]                                                        | 0.0763                                              |
| GOF (F <sup>2</sup> )                                                              | 1.048                                               |
| Residual electron density, e Å <sup>-3</sup> (ρ <sub>min</sub> /ρ <sub>max</sub> ) | 1.27/-0.54                                          |

$$^a R1 = \sum \|F_o\| - \|F_c\| / \sum \|F_o\|; ^b wR2 = \sqrt{\sum [w(F_o^2 - F_c^2)^2] / \sum [w(F_o^2)^2]}$$

**Table S2.** Bond lengths and bond angles for 1.

| Atom | Atom            | Length/Å | Atom | Atom | Atom            | Angle/°    |
|------|-----------------|----------|------|------|-----------------|------------|
| Dy1  | O1              | 2.455(3) | O1   | Dy1  | O8 <sup>i</sup> | 106.63(9)  |
| Dy1  | O2              | 2.414(3) | O2   | Dy1  | O5              | 128.13(10) |
| Dy1  | O4              | 2.408(3) | O2   | Dy1  | O7              | 88.70(10)  |
| Dy1  | O5              | 2.452(3) | O2   | Dy1  | O8 <sup>i</sup> | 76.34(9)   |
| Dy1  | O7              | 2.419(3) | O4   | Dy1  | O1              | 74.57(10)  |
| Dy1  | O8 <sup>i</sup> | 2.617(3) | O4   | Dy1  | O2              | 79.37(10)  |
| Dy1  | O8              | 2.336(3) | O4   | Dy1  | O7              | 149.31(10) |
| Dy1  | O10             | 2.310(3) | O8   | Dy1  | O8 <sup>i</sup> | 67.08(10)  |
| Dy1  | O11             | 2.380(2) |      |      |                 |            |

Symmetry code: (i) 1-X, 1-Y, 2-Z

**Table S3.** Hydrogen-bond geometry (Å, °).

| D—H...A                      | D—H    | H...A  | D...A     | D—H...A |
|------------------------------|--------|--------|-----------|---------|
| O11—H11A...O5 <sup>ii</sup>  | 0.9700 | 1.7800 | 2.692 (4) | 154.00  |
| O11—H11B...O2 <sup>i</sup>   | 0.9700 | 1.8700 | 2.715 (4) | 144.00  |
| C3—H3...O2                   | 0.9300 | 2.5500 | 2.868 (6) | 100.00  |
| C10—H10A...O9 <sup>iii</sup> | 0.9600 | 2.5900 | 3.360 (7) | 138.00  |
| C13—H13...O4                 | 0.9300 | 2.4700 | 2.821 (5) | 102.00  |
| C20—H20A...O4 <sup>iv</sup>  | 0.9600 | 2.4600 | 3.409 (7) | 168.00  |
| C23—H23...O7                 | 0.9300 | 2.4600 | 2.810 (6) | 102.00  |

Symmetry codes : (i) -x+1, -y+1, -z+2 ; (ii) -x, -y+1, -z+2 ; (iii) x+1, y, z-1 ; (iv) -x+1, -y+1, -z+1.

**Table S4.** SHAPE analysis.

|                                           | JJCU   | CCU   | JCSAPR | CSAPR | JTCTPR | TCTPR |
|-------------------------------------------|--------|-------|--------|-------|--------|-------|
| <b>1</b>                                  | 10.049 | 8.522 | 3.020  | 2.116 | 3.093  | 2.584 |
| JJCU: Capped cube                         |        |       |        |       |        |       |
| CCU: Spherical-relaxed capped cube        |        |       |        |       |        |       |
| JCSAPR: Capped square antiprism           |        |       |        |       |        |       |
| CSAPR: Spherical capped square antiprism  |        |       |        |       |        |       |
| JTCTPR: Tricapped trigonal prism          |        |       |        |       |        |       |
| TCTPR: Spherical tricapped trigonal prism |        |       |        |       |        |       |

**Table S5.** Fitting of the Cole-Cole plots with a generalized Debye model for temperature ranging from 1.8 to 5.7 K under a 2250 Oe DC field for **1**.

| <i>T</i> (K) | $\alpha$ | $\chi^s$ (cm <sup>3</sup> ·mol <sup>-1</sup> ) | $\chi^r$ (cm <sup>3</sup> ·mol <sup>-1</sup> ) |
|--------------|----------|------------------------------------------------|------------------------------------------------|
| 1.8          | 4.64744  | 5.55985                                        | 0.89909                                        |
| 2.1          | 3.94644  | 4.92406                                        | 0.871                                          |
| 2.4          | 3.77389  | 4.75026                                        | 0.86587                                        |
| 2.7          | 3.72501  | 4.51057                                        | 0.88919                                        |
| 3            | 3.34129  | 4.61308                                        | 0.80774                                        |
| 3.3          | 3.04781  | 4.66123                                        | 0.73563                                        |
| 3.6          | 2.91137  | 4.69504                                        | 0.6903                                         |
| 3.9          | 2.54359  | 4.85934                                        | 0.51422                                        |
| 4.2          | 2.47852  | 4.8564                                         | 0.43933                                        |
| 4.5          | 2.4661   | 4.78597                                        | 0.37824                                        |
| 4.8          | 2.4739   | 4.68053                                        | 0.33631                                        |
| 5.1          | 2.58814  | 4.6709                                         | 0.18245                                        |
| 5.4          | 2.50496  | 4.41138                                        | 0.29951                                        |
| 5.5          | 2.36457  | 4.206                                          | 0.41677                                        |
| 5.7          | 2.73292  | 4.39344                                        | 0.15239                                        |
